# Supplementary material for: Intake of whole grain foods and risk of type 2 diabetes: results from three prospective cohort studies
Source: PubMed Central journal article supplement — BMJ. 2020 Jul 8;370:m2206. doi: 10.1136/bmj.m2206 (PMC7341349; doi:10.1136/bmj.m2206), 2020-07-08
Supplement: huy052560.ww.pdf [file huy052560.ww.pdf]

**Supplemental table 1.** Age-adjusted Pearson partial correlation coefficients matrix for individual whole grain foods.

|                                 | Whole grain<br>breakfast cereal | Oatmeal | Dark bread | Brown rice | Popcorn | Added bran | Wheat germ |
|---------------------------------|---------------------------------|---------|------------|------------|---------|------------|------------|
| Whole grain<br>breakfast cereal | 1                               | 0.07    | 0.14       | 0.05       | 0.03    | 0.11       | 0.07       |
| P value                         |                                 | <.0001  | <.0001     | <.0001     | <.0001  | <.0001     | <.0001     |
| Oatmeal                         | -                               | 1       | 0.12       | 0.14       | 0.03    | 0.11       | 0.11       |
| P value                         | -                               |         | <.0001     | <.0001     | <.0001  | <.0001     | <.0001     |
| Dark bread                      | -                               | -       | 1          | 0.13       | 0.03    | 0.07       | 0.07       |
| P value                         | -                               | -       |            | <.0001     | <.0001  | <.0001     | <.0001     |
| Brown rice                      | -                               | -       | -          | 1          | 0.06    | 0.10       | 0.11       |
| P value                         | -                               | -       | -          |            | <.0001  | <.0001     | <.0001     |
| Popcorn                         | -                               | -       | -          | -          | 1       | 0.03       | 0.01       |
| P value                         | -                               | -       | -          | -          |         | <.0001     | <.0001     |
| Added bran                      | -                               | -       | -          | -          | -       | 1          | 0.28       |
| P value                         | -                               | -       | -          | -          | -       |            | <.0001     |
| Wheat germ                      | -                               | -       | -          | -          | -       | -          | 1          |
| P value                         | -                               | -       | -          | -          | -       | -          |            |

**Supplemental table 2.** Multivariable-adjusted pooled HRs (95% confidence intervals) of type 2 diabetes for individual whole grain food consumption in Nurses' Health Study (1984-2014), Nurses' Health Study II (1991-2017), Health Professionals Follow-up Study (1986-2016)

|                               | Consumption levels         |                                  |                                    |                    | P for trend† | Per serving daily  |
|-------------------------------|----------------------------|----------------------------------|------------------------------------|--------------------|--------------|--------------------|
|                               | Never or < 1 serving/month | 1 serving/month - 1 serving/week | 1 serving/week – 4-6 servings/week | ≥1 servings/d      |              |                    |
| <b>Cold breakfast cereal</b>  |                            |                                  |                                    |                    |              |                    |
| NHS*                          |                            |                                  |                                    |                    |              |                    |
| Cases/person-time             | 3,474/619,365              | 1,777/344,185                    | 2,343/591,499                      | 576/168,484        |              |                    |
| Multivariable adjusted model* | 1.00                       | 0.92(0.87 to 0.97)               | 0.74(0.70 to 0.79)                 | 0.74(0.68 to 0.81) | <.0001       | 0.69(0.63 to 0.75) |
| NHSII*                        |                            |                                  |                                    |                    |              |                    |
| Cases/person-time             | 2,215/516,774              | 1,680/430,687                    | 2,314/818,940                      | 863/313,137        |              |                    |
| Multivariable adjusted model* | 1.00                       | 0.95(0.89 to 1.02)               | 0.76(0.72 to 0.81)                 | 0.87(0.80 to 0.95) | <.0001       | 0.84(0.77 to 0.90) |
| HPFS*                         |                            |                                  |                                    |                    |              |                    |
| Cases/person-time             | 1,259/249,423              | 656/144,508                      | 914/253,885                        | 558/167,910        |              |                    |
| Multivariable adjusted model* | 1.00                       | 0.90(0.82 to 0.99)               | 0.76(0.69 to 0.83)                 | 0.82(0.74 to 0.90) | <.0001       | 0.81(0.73 to 0.89) |
| <b>Dark bread</b>             |                            |                                  |                                    |                    |              |                    |
| NHS*                          |                            |                                  |                                    |                    |              |                    |
| Cases/person-time             | 1,007/168,756              | 1,739/336,210                    | 2,856/648,800                      | 2,568/569,767      |              |                    |
| Multivariable adjusted model* | 1.00                       | 0.91(0.84 to 0.99)               | 0.81(0.76 to 0.88)                 | 0.81(0.75 to 0.87) | <0.001       | 0.94(0.91 to 0.98) |
| NHSII*                        |                            |                                  |                                    |                    |              |                    |
| Cases/person-time             | 1,081/235,814              | 1,603/417,999                    | 2,532/821,312                      | 1,856/604,413      |              |                    |
| Multivariable adjusted model* | 1.00                       | 0.91(0.84 to 0.98)               | 0.78(0.72 to 0.84)                 | 0.78(0.73 to 0.85) | <0.001       | 0.94(0.90 to 0.97) |
| HPFS*                         |                            |                                  |                                    |                    |              |                    |
| Cases/person-time             | 471/86,097                 | 775/162,742                      | 988/258,516                        | 1,153/308,371      |              |                    |
| Multivariable adjusted model* | 1.00                       | 0.92(0.82 to 1.03)               | 0.73(0.66 to 0.82)                 | 0.76(0.68 to 0.85) | <.0001       | 0.90(0.86 to 0.94) |
| <b>Popcorn</b>                |                            |                                  |                                    |                    |              |                    |
| NHS*                          |                            |                                  |                                    |                    |              |                    |
| Cases/person-time             | 2,664/580,505              | 3,887/810,792                    | 1,399/292,278                      | 220/39,957         |              |                    |
| Multivariable adjusted model* | 1.00                       | 0.98(0.93 to 1.04)               | 0.90(0.84 to 0.97)                 | 1.04(0.91 to 1.20) | 0.55         | 0.97(0.88 to 1.06) |
| NHSII*                        |                            |                                  |                                    |                    |              |                    |
| Cases/person-time             | 865/278,229                | 3,511/1,121,424                  | 2,166/578,081                      | 530/101,804        |              |                    |
| Multivariable adjusted model* | 1.00                       | 0.91(0.85 to 0.98)               | 0.91(0.84 to 0.99)                 | 1.07(0.95 to 1.19) | 0.02         | 1.08(1.01 to 1.15) |
| HPFS*                         |                            |                                  |                                    |                    |              |                    |
| Cases/person-time             | 958/234,309                | 1,581/391,612                    | 656/155,283                        | 192/34,522         |              |                    |
| Multivariable adjusted model* | 1.00                       | 0.96(0.88 to 1.04)               | 0.95(0.86 to 1.05)                 | 1.15(0.98 to 1.35) | <0.001       | 1.16(1.06 to 1.26) |
|                               | Never or < 1 serving/month | 1 serving/month - 1 serving/week | ≥2 servings/week                   |                    |              |                    |

|                               |                 |                    |                    |   |        |                    |
|-------------------------------|-----------------|--------------------|--------------------|---|--------|--------------------|
| <b>Oatmeal</b>                |                 |                    |                    |   |        |                    |
| NHS*                          |                 |                    |                    |   |        |                    |
| Cases/person-time             | 4,555/925,185   | 2,847/584,793      | 768/213,554        | - |        |                    |
| Multivariable adjusted model* | 1.00            | 0.93(0.89 to 0.98) | 0.79(0.73 to 0.85) | - | 0.005  | 0.76(0.63 to 0.92) |
| NHSII*                        |                 |                    |                    |   |        |                    |
| Cases/person-time             | 3,166/891,177   | 2,961/844,732      | 945/343,630        | - |        |                    |
| Multivariable adjusted model* | 1.00            | 1.00(0.95 to 1.05) | 0.83(0.77 to 0.89) | - | 0.27   | 0.90(0.74 to 1.09) |
| HPFS*                         |                 |                    |                    |   |        |                    |
| Cases/person-time             | 2,002/432,537   | 1,013/255,974      | 372/127,214        | - |        |                    |
| Multivariable adjusted model* | 1.00            | 0.89(0.83 to 0.96) | 0.71(0.63 to 0.79) | - | <.0001 | 0.54(0.42 to 0.69) |
| <b>Brown rice</b>             |                 |                    |                    |   |        |                    |
| NHS*                          |                 |                    |                    |   |        |                    |
| Cases/person-time             | 5,914/1,153,358 | 2,029/495,787      | 227/74,387         | - |        |                    |
| Multivariable adjusted model* | 1.00            | 0.95(0.91 to 1.01) | 0.79(0.69 to 0.91) | - | 0.006  | 0.61(0.43 to 0.87) |
| NHSII*                        |                 |                    |                    |   |        |                    |
| Cases/person-time             | 4,133/1,068,432 | 2,468/828,122      | 471/182,984        | - |        |                    |
| Multivariable adjusted model* | 1.00            | 0.97(0.92 to 1.03) | 0.92(0.83 to 1.01) | - | 0.88   | 1.02(0.80 to 1.30) |
| HPFS*                         |                 |                    |                    |   |        |                    |
| Cases/person-time             | 1,814/388,547   | 1,358/360,879      | 215/66,300         | - |        |                    |
| Multivariable adjusted model† | 1.00            | 0.95(0.89 to 1.02) | 0.91(0.79 to 1.05) | - | 0.48   | 0.89(0.66 to 1.22) |
| <b>Added bran</b>             |                 |                    |                    |   |        |                    |
| NHS*                          |                 |                    |                    |   |        |                    |
| Cases/person-time             | 6,688/1,304,971 | 862/219,812        | 620/198,750        | - |        |                    |
| Multivariable adjusted model* | 1.00            | 0.87(0.81 to 0.94) | 0.81(0.74 to 0.88) | - | 0.002  | 0.83(0.74 to 0.93) |
| NHSII*                        |                 |                    |                    |   |        |                    |
| Cases/person-time             | 6,096/1,729,096 | 689/236,455        | 287/113,987        | - |        |                    |
| Multivariable adjusted model* | 1.00            | 0.99(0.92 to 1.08) | 0.94(0.84 to 1.06) | - | 0.97   | 1.00(0.86 to 1.15) |
| HPFS*                         |                 |                    |                    |   |        |                    |
| Cases/person-time             | 2,635/600,893   | 438/110,282        | 314/104,551        | - |        |                    |
| Multivariable adjusted model* | 1.00            | 0.95(0.85 to 1.05) | 0.84(0.74 to 0.94) | - | 0.08   | 0.91(0.82 to 1.01) |
| <b>Wheat germ</b>             |                 |                    |                    |   |        |                    |
| NHS*                          |                 |                    |                    |   |        |                    |
| Cases/person-time             | 7,551/1,540,820 | 450/123,833        | 169/58,880         | - |        |                    |
| Multivariable adjusted model* | 1.00            | 0.96(0.87 to 1.05) | 0.90(0.77 to 1.05) | - | 0.57   | 0.93(0.74 to 1.18) |
| NHSII*                        |                 |                    |                    |   |        |                    |
| Cases/person-time             | 6,718/1,919,927 | 295/126,254        | 59/33,356          | - |        |                    |
| Multivariable adjusted model* | 1.00            | 0.91(0.81 to 1.02) | 0.84(0.65 to 1.08) | - | 0.19   | 0.71(0.43 to 1.18) |
| HPFS*                         |                 |                    |                    |   |        |                    |
| Cases/person-time             | 3,130/728,505   | 169/53,822         | 88/33,398          | - |        |                    |

---

|                               |      |                    |                    |   |      |                    |
|-------------------------------|------|--------------------|--------------------|---|------|--------------------|
| Multivariable adjusted model* | 1.00 | 0.85(0.73 to 1.00) | 0.87(0.70 to 1.08) | - | 0.32 | 0.87(0.66 to 1.14) |
|-------------------------------|------|--------------------|--------------------|---|------|--------------------|

---

\*Adjusted for age (years), ethnicity (white, African American, Asian, others), body mass index (calculated as weight in kilograms divided by height in meters squared) (<21.0, 21.0-22.9, 23.0-24.9, 25.0-26.9, 27.0-29.9, 30.0-32.9, 33.0-34.9, or  $\geq 35.0$  kg/m<sup>2</sup>), smoking status (never smoked, past smoker, currently smoke 1-14 cigarettes per day, 15-24 cigarettes per day, or  $\geq 25$  cigarettes per day), alcohol intake (0, 0.1-4.9, 5.0-9.9, 10.0-14.9, 15.0-29.9, and  $\geq 30.0$  g/d), multivitamin use (yes, no), physical activity (quintiles), modified alternative healthy eating index (quintiles), and family history of diabetes. For women, postmenopausal hormone use (never, former, or current hormone use, or missing), and oral contraceptive use were further adjusted.

†P for trend was calculated using continuous exposure variables.

**Supplemental table 3.** Association between regular and light/fat free popcorn intake and risk of type 2 diabetes in Nurses' Health Study (2002-2012), Nurses' Health Study II (2003-2013) and Health Professionals Follow-up study (2002-2012)

|                               | Regular popcorn  |                                   |                        |                 | Light, fat free popcorn |                                   |                        |                 |
|-------------------------------|------------------|-----------------------------------|------------------------|-----------------|-------------------------|-----------------------------------|------------------------|-----------------|
|                               | <1<br>serving/mo | 1 serving/mo<br>–<br>1 serving/wk | > 2<br>servings/wk     | P for<br>trend† | <1<br>serving/mo        | 1 serving/mo<br>–<br>1 serving/wk | > 2<br>servings/wk     | P for<br>trend† |
| <b>NHS</b>                    |                  |                                   |                        |                 |                         |                                   |                        |                 |
| Cases/person-years            | 1,460/331,778    | 517/94,501                        | 63/11,404              |                 | 1,267/292,921           | 620/118,883                       | 153/25,879             |                 |
| Multivariable-adjusted model* | 1.00             | 1.03 (0.93 to<br>1.15)            | 0.99 (0.76 to<br>1.28) | 0.96            | 1.00                    | 1.11 (1.01 to<br>1.23)            | 1.23 (1.03 to<br>1.46) | 0.02            |
| <b>NHSII</b>                  |                  |                                   |                        |                 |                         |                                   |                        |                 |
| Cases/person-years            | 1,801/429,260    | 1,374/299,875                     | 230/41,246             |                 | 1,709/385,037           | 1,329/311,713                     | 367/73,631             |                 |
| Multivariable-adjusted model* | 1.00             | 0.94 (0.87 to<br>1.01)            | 1.00 (0.87 to<br>1.15) | 0.98            | 1.00                    | 0.96 (0.89 to<br>1.03)            | 1.02 (0.91 to<br>1.15) | 0.59            |
| <b>HPFS</b>                   |                  |                                   |                        |                 |                         |                                   |                        |                 |
| Cases/person-years            | 385/104,765      | 288/64,812                        | 45/8,759               |                 | 486/121,973             | 192/47,790                        | 40/8,573               |                 |
| Multivariable-adjusted model* | 1.00             | 1.06 (0.90 to<br>1.24)            | 1.22 (0.88 to<br>1.67) | 0.21            | 1.00                    | 0.99 (0.83 to<br>1.17)            | 1.14 (0.82 to<br>1.59) | 0.47            |
| <b>Pooled†</b>                |                  |                                   |                        |                 |                         |                                   |                        |                 |
| Multivariable-adjusted model* | 1.00             | 0.98 (0.93 to<br>1.04)            | 1.02 (0.91 to<br>1.15) | 0.65            | 1.00                    | 1.01 (0.95 to<br>1.06)            | 1.09 (0.99 to<br>1.19) | 0.06            |

\*Multivariable-adjusted model 1 adjusted for age (years), ethnicity (white, African American, Asian, others), body mass index (calculated as weight in kilograms divided by height in meters squared) (<21.0, 21.0-22.9, 23.0-24.9, 25.0-26.9, 27.0-29.9, 30.0-32.9, 33.0-34.9, or ≥35.0 kg/m<sup>2</sup>), smoking status (never smoked, past smoker, currently smoke 1-14 cigarettes per day, 15-24 cigarettes per day, or ≥25 cigarettes per day), alcohol intake (0, 0.1-4.9, 5.0-9.9, 10.0-14.9, 15.0-29.9, and ≥30.0 g/d), multivitamin use (yes, no), physical activity (quintiles), modified alternative healthy eating index (quintiles), and family history of diabetes. For women, postmenopausal hormone use (never, former, or current hormone use, or missing), and oral contraceptive use were further adjusted.

Regular popcorn and light/fat free popcorn were mutually adjusted.

†Study estimates from three cohorts were pooled using a fixed effects model.

††P for trend was calculated using continuous exposure variables.

**Supplemental table 4.** Multivariable-adjusted pooled HRs (95% confidence intervals) of type 2 diabetes for individual whole grain food consumption in Nurses' Health Study (1984-2014), Nurses' Health Study II (1991-2017), Health Professionals Follow-up Study (1986-2016) mutually adjusting for each whole grain foods

|                                     | Never or < 1<br>serving/month | 1 serving/month -<br>1 serving/week | 1 serving/week –<br>4-6 servings/week | ≥1 servings/d       |
|-------------------------------------|-------------------------------|-------------------------------------|---------------------------------------|---------------------|
| <b>Whole grain breakfast cereal</b> |                               |                                     |                                       |                     |
| Cases/person-time                   | 6,948/1,385,562               | 4,113/919,380                       | 5,571/1,664,324                       | 1,997/649,531       |
| Multivariable adjusted model*       | 1.00                          | 0.95 (0.91 to 0.99)                 | 0.79 (0.76 to 0.82)                   | 0.83 (0.79 to 0.88) |
| <b>Dark bread</b>                   |                               |                                     |                                       |                     |
| Cases/person-time                   | 2,559/490,667                 | 4,117/916,951                       | 6,376/1,728,628                       | 5,577/1,482,551     |
| Multivariable adjusted model*       | 1.00                          | 0.92 (0.88 to 0.97)                 | 0.83 (0.79 to 0.87)                   | 0.84 (0.79 to 0.88) |
| <b>Popcorn</b>                      |                               |                                     |                                       |                     |
| Cases/person-time                   | 4,487/1,093,043               | 8,979/2,323,828                     | 4,221/1,025,642                       | 942/176,283         |
| Multivariable adjusted model*       | 1.00                          | 0.98 (0.94 to 1.02)                 | 0.96 (0.92 to 1.01)                   | 1.09 (1.01 to 1.18) |
|                                     | Never or < 1<br>serving/month | 1 serving/month -<br>1 serving/week | ≥2 servings/week                      |                     |
| <b>Oatmeal</b>                      |                               |                                     |                                       |                     |
| Cases/person-time                   | 9,723/2,248,899               | 6,821/1,685,499                     | 2,085/684,398                         | -                   |
| Multivariable adjusted model*       | 1.00                          | 1.00 (0.97 to 1.04)                 | 0.86 (0.82 to 0.90)                   | -                   |
| <b>Brown rice</b>                   |                               |                                     |                                       |                     |
| Cases/person-time                   | 11,861/2,610,337              | 5,855/1,684,788                     | 913/323,671                           | -                   |
| Multivariable adjusted model*       | 1.00                          | 1.00 (0.97 to 1.04)                 | 0.95 (0.88 to 1.02)                   | -                   |
| <b>Added bran</b>                   |                               |                                     |                                       |                     |
| Cases/person-time                   | 15,419/3,634,960              | 1,989/566,549                       | 1,221/417,288                         | -                   |
| Multivariable adjusted model*       | 1.00                          | 0.97 (0.93 to 1.02)                 | 0.93 (0.87 to 0.99)                   | -                   |
| <b>Wheat germ</b>                   |                               |                                     |                                       |                     |
| Cases/person-time                   | 17,399/4,189,252              | 914/303,909                         | 316/125,634                           | -                   |
| Multivariable adjusted model*       | 1.00                          | 0.98 (0.91 to 1.05)                 | 1.00 (0.89 to 1.13)                   | -                   |

\*Adjusted for age (years), ethnicity (white, African American, Asian, others), body mass index (calculated as weight in kilograms divided by height in meters squared) (<21.0, 21.0-22.9, 23.0-24.9, 25.0-26.9, 27.0-29.9, 30.0-32.9, 33.0-34.9, or ≥35.0 kg/m<sup>2</sup>), smoking status (never smoked, past smoker, currently smoke 1-14 cigarettes per day, 15-24 cigarettes per day, or ≥25 cigarettes per day), alcohol intake (0, 0.1-4.9, 5.0-9.9, 10.0-14.9, 15.0-29.9, and ≥30.0 g/d), multivitamin use (yes, no), physical activity (quintiles), modified alternative healthy eating index (quintiles), and family history of diabetes. Study estimates from three cohorts were pooled using a fixed effects model.

**Supplemental table 5.** Multivariable-adjusted pooled HRs (95% confidence intervals) of type 2 diabetes for individual whole grain food consumption in Nurses' Health Study (1984-2014), Nurses' Health Study II (1991-2017), Health Professionals Follow-up Study (1986-2016) using baseline intake, simple updated intake, latency analysis, and adjustment for baseline BMI.

|                                          | Consumption levels         |                                  |                                    |                     | P for trend‡ | Per serving daily   |
|------------------------------------------|----------------------------|----------------------------------|------------------------------------|---------------------|--------------|---------------------|
|                                          | Never or < 1 serving/month | 1 serving/month - 1 serving/week | 1 serving/week – 4-6 servings/week | ≥1 servings/d       |              |                     |
| <b>Whole grain cold breakfast cereal</b> |                            |                                  |                                    |                     |              |                     |
| Baseline intake                          |                            |                                  |                                    |                     |              |                     |
| Cases/person-time                        | 8,743/1,917,175            | 4,286/1,018,276                  | 3,160/869,328                      | 2,440/814,017       |              |                     |
| Multivariable adjusted model*            | 1.00                       | 0.97 (0.94 to 1.01)              | 0.89 (0.85 to 0.93)                | 0.84 (0.80 to 0.88) | <.0001       | 0.84 (0.80 to 0.88) |
| Simple updated intake                    |                            |                                  |                                    |                     |              |                     |
| Cases/person-time                        | 7,369/1,558,846            | 3,759/891,706                    | 3,185/855,410                      | 2,463/811,327       |              |                     |
| Multivariable adjusted model*            | 1.00                       | 0.93 (0.89 to 0.97)              | 0.86 (0.82 to 0.90)                | 0.80 (0.76 to 0.83) | <.0001       | 0.80 (0.76 to 0.84) |
| Lag 4 years                              |                            |                                  |                                    |                     |              |                     |
| Cases/person-time                        | 5,979/1,410,131            | 3,647/934,115                    | 5,094/1,696,564                    | 1,778/657,371       |              |                     |
| Multivariable adjusted model*            | 1.00                       | 0.93 (0.90 to 0.97)              | 0.75 (0.72 to 0.78)                | 0.82 (0.77 to 0.86) | <.0001       | 0.78 (0.74 to 0.82) |
| Adjusting for baseline BMI               |                            |                                  |                                    |                     |              |                     |
| Cases/person-time                        | 6,916/1,378,969            | 4,111/918,809                    | 5,614/1,673,776                    | 1,988/647,243       |              |                     |
| Multivariable adjusted model†            | 1.00                       | 0.93 (0.90 to 0.97)              | 0.76 (0.73 to 0.78)                | 0.80 (0.76 to 0.84) | <.0001       | 0.76 (0.73 to 0.80) |
| <b>Dark bread</b>                        |                            |                                  |                                    |                     |              |                     |
| Baseline intake                          |                            |                                  |                                    |                     |              |                     |
| Cases/person-time                        | 3,375/713,847              | 4,998/1,207,153                  | 4,381/1,113,311                    | 5,875/1,584,484     |              |                     |
| Multivariable adjusted model*            | 1.00                       | 0.91 (0.87 to 0.95)              | 0.90 (0.86 to 0.94)                | 0.84 (0.81 to 0.88) | <.0001       | 0.93 (0.91 to 0.95) |
| Simple updated intake                    |                            |                                  |                                    |                     |              |                     |
| Cases/person-time                        | 2,914/618,411              | 4,603/1,116,549                  | 4,166/1,048,825                    | 5,219/1,370,886     |              |                     |
| Multivariable adjusted model*            | 1.00                       | 0.93 (0.88 to 0.97)              | 0.92 (0.87 to 0.96)                | 0.87 (0.83 to 0.92) | <.0001       | 0.95 (0.93 to 0.97) |
| Lag 4 years                              |                            |                                  |                                    |                     |              |                     |
| Cases/person-time                        | 2,230/501,263              | 3,612/931,461                    | 5,778/1,760,330                    | 4,878/1,505,127     |              |                     |
| Multivariable adjusted model*            | 1.00                       | 0.91 (0.87 to 0.96)              | 0.78 (0.74 to 0.82)                | 0.78 (0.74 to 0.82) | <.0001       | 0.92 (0.90 to 0.94) |

|                                           |                            |                                  |                     |                     |        |                     |
|-------------------------------------------|----------------------------|----------------------------------|---------------------|---------------------|--------|---------------------|
| Adjusting for baseline BMI                |                            |                                  |                     |                     |        |                     |
| Cases/person-time                         | 2,541/487,803              | 4,113/914,337                    | 6,410/1,735,940     | 5,565/1,480,717     |        |                     |
| Multivariable adjusted model <sup>†</sup> | 1.00                       | 0.91 (0.87, 0.96)                | 0.79 (0.75, 0.83)   | 0.78 (0.75, 0.82)   | <.0001 | 0.93 (0.91, 0.95)   |
| <b>Popcorn</b>                            |                            |                                  |                     |                     |        |                     |
| Baseline intake                           |                            |                                  |                     |                     |        |                     |
| Cases/person-time                         | 5,455/1,354,751            | 9,402/2,429,419                  | 2,558/580,447       | 1,214/254,181       |        |                     |
| Multivariable adjusted model*             | 1.00                       | 1.00 (0.97 to 1.04)              | 1.07 (1.02 to 1.13) | 1.09 (1.02 to 1.17) | 0.001  | 1.07 (1.03 to 1.11) |
| Simple updated intake                     |                            |                                  |                     |                     |        |                     |
| Cases/person-time                         | 4,913/1,290,342            | 8,607/2,173,814                  | 2,434/515,576       | 1,056/202,581       |        |                     |
| Multivariable adjusted model*             | 1.00                       | 1.01 (0.98 to 1.05)              | 1.12 (1.06 to 1.18) | 1.13 (1.05 to 1.21) | 0.0002 | 1.08 (1.04 to 1.13) |
| Lag 4 years                               |                            |                                  |                     |                     |        |                     |
| Cases/person-time                         | 3,802/1,112,731            | 7,961/2,361,521                  | 3,907/1,045,241     | 828/178,689         |        |                     |
| Multivariable adjusted model*             | 1.00                       | 0.98 (0.94 to 1.02)              | 0.93 (0.89 to 0.98) | 1.10 (1.01 to 1.19) | 0.0002 | 1.09 (1.04 to 1.15) |
| Adjusting for baseline BMI                |                            |                                  |                     |                     |        |                     |
| Cases/person-time                         | 4,475/1,091,138            | 8,972/2,321,695                  | 4,254/1,031,380     | 928/174,583         |        |                     |
| Multivariable adjusted model <sup>†</sup> | 1.00                       | 0.98 (0.94 to 1.02)              | 0.96 (0.91 to 1.00) | 1.13 (1.05 to 1.22) | <.0001 | 1.11 (1.06 to 1.16) |
|                                           | Never or < 1 serving/month | 1 serving/month - 1 serving/week | ≥2 servings/week    |                     |        |                     |
| <b>Oatmeal</b>                            |                            |                                  |                     |                     |        |                     |
| <b>Cases/person-time</b>                  |                            |                                  |                     |                     |        |                     |
| Baseline intake                           |                            |                                  |                     |                     |        |                     |
| Cases/person-time                         | 11,026/2,663,095           | 6,459/1,615,741                  | 1,144/339,961       | -                   |        |                     |
| Multivariable adjusted model*             | 1.00                       | 0.99 (0.96 to 1.02)              | 0.91 (0.85 to 0.97) | -                   | 0.001  | 0.84 (0.75 to 0.93) |
| Simple updated intake                     |                            |                                  |                     |                     |        |                     |
| Cases/person-time                         | 9,341/2,196,788            | 6,186/1,521,201                  | 1,475/457,224       | -                   |        |                     |
| Multivariable adjusted model*             | 1.00                       | 0.98 (0.95 to 1.02)              | 0.84 (0.79 to 0.89) | -                   | <.0001 | 0.73 (0.66 to 0.81) |
| Lag 4 years                               |                            |                                  |                     |                     |        |                     |
| Cases/person-time                         | 8,552/2,285,824            | 6,033/1,711,257                  | 1,913/701,098       | -                   |        |                     |
| Multivariable adjusted model*             | 1.00                       | 0.94 (0.91 to 0.97)              | 0.77 (0.73 to 0.81) | -                   | <.0001 | 0.70 (0.62 to 0.80) |
| Adjusting for baseline BMI                |                            |                                  |                     |                     |        |                     |
| Cases/person-time                         | 9,693/2,243,677            | 6,837/1,686,000                  | 2,099/689,118       | -                   |        |                     |



|                                           |                  |                     |                     |   |        |                     |
|-------------------------------------------|------------------|---------------------|---------------------|---|--------|---------------------|
| Multivariable adjusted model <sup>†</sup> | 1.00             | 0.95 (0.92 to 0.98) | 0.78 (0.75 to 0.82) | - | <.0001 | 0.73 (0.65 to 0.83) |
| <b>Brown rice</b>                         |                  |                     |                     |   |        |                     |
| Baseline intake                           |                  |                     |                     |   |        |                     |
| Cases/person-time                         | 12,806/2,910,472 | 5,232/1,514,576     | 591/193,748         | - |        |                     |
| Multivariable adjusted model*             | 1.00             | 0.98 (0.94 to 1.01) | 0.94 (0.86 to 1.03) | - | 0.06   | 0.86 (0.74 to 1.01) |
| Simple updated intake                     |                  |                     |                     |   |        |                     |
| Cases/person-time                         | 11,249/2,518,460 | 5,131/1,465,643     | 573/184,759         | - |        |                     |
| Multivariable adjusted model*             | 1.00             | 0.98 (0.94 to 1.01) | 0.95 (0.86 to 1.04) | - | 0.13   | 0.88 (0.75 to 1.04) |
| Lag 4 years                               |                  |                     |                     |   |        |                     |
| Cases/person-time                         | 10,377/2,650,110 | 5,284/1,717,342     | 837/330,729         | - |        |                     |
| Multivariable adjusted model*             | 1.00             | 0.96 (0.93 to 0.99) | 0.87 (0.81 to 0.94) | - | 0.10   | 0.86 (0.72 to 1.03) |
| Adjusting for baseline BMI                |                  |                     |                     |   |        |                     |
| Cases/person-time                         | 11,842/2,605,795 | 5,867/1,687,506     | 920/325,495         | - |        |                     |
| Multivariable adjusted model <sup>†</sup> | 1.00             | 0.97 (0.94 to 1.01) | 0.89 (0.83 to 0.95) | - | 0.20   | 0.90 (0.76 to 1.06) |
| <b>Added bran</b>                         |                  |                     |                     |   |        |                     |
| Baseline intake                           |                  |                     |                     |   |        |                     |
| Cases/person-time                         | 15,947/3,812,498 | 1,739/492,196       | 943/314,102         | - |        |                     |
| Multivariable adjusted model*             | 1.00             | 0.94 (0.89 to 0.99) | 0.86 (0.81 to 0.92) | - | <.0001 | 0.88 (0.83 to 0.94) |
| Simple updated intake                     |                  |                     |                     |   |        |                     |
| Cases/person-time                         | 14,718/3,547,284 | 1,476/382,707       | 796/245,954         | - |        |                     |
| Multivariable adjusted model*             | 1.00             | 1.04 (0.98 to 1.10) | 0.94 (0.87 to 1.01) | - | 0.03   | 0.93 (0.87 to 0.99) |
| Lag 4 years                               |                  |                     |                     |   |        |                     |
| Cases/person-time                         | 13,652/3,696,087 | 1,762/576,396       | 1,084/425,698       | - |        |                     |
| Multivariable adjusted model*             | 1.00             | 0.92 (0.87 to 0.97) | 0.84 (0.79 to 0.89) | - | 0.001  | 0.89 (0.82 to 0.95) |
| Adjusting for baseline BMI                |                  |                     |                     |   |        |                     |
| Cases/person-time                         | 15,413/3,633,469 | 1,992/567,552       | 1,224/417,775       | - |        |                     |
| Multivariable adjusted model <sup>†</sup> | 1.00             | 0.93 (0.89 to 0.97) | 0.84 (0.79 to 0.90) | - | 0.003  | 0.90 (0.84 to 0.96) |
| <b>Wheat germ</b>                         |                  |                     |                     |   |        |                     |
| Baseline intake                           |                  |                     |                     |   |        |                     |
| Cases/person-time                         | 17,534/4,231,388 | 846/297,630         | 249/89,777          | - |        |                     |

|                               |                  |                     |                     |   |      |                     |
|-------------------------------|------------------|---------------------|---------------------|---|------|---------------------|
| Multivariable adjusted model* | 1.00             | 0.85 (0.79 to 0.91) | 0.89 (0.78 to 1.01) | - | 0.01 | 0.82 (0.71 to 0.95) |
| Simple updated intake         |                  |                     |                     |   |      |                     |
| Cases/person-time             | 16,050/3,872,101 | 718/228,377         | 209/71,566          | - |      |                     |
| Multivariable adjusted model* | 1.00             | 0.94 (0.87 to 1.02) | 1.01 (0.88 to 1.17) | - | 0.31 | 0.92 (0.78 to 1.08) |
| Lag 4 years                   |                  |                     |                     |   |      |                     |
| Cases/person-time             | 15,425/4,262,243 | 805/307,751         | 268/128,186         | - |      |                     |
| Multivariable adjusted model* | 1.00             | 0.91 (0.85 to 0.98) | 0.82 (0.72 to 0.92) | - | 0.01 | 0.78 (0.64 to 0.95) |
| Adjusting for baseline BMI    |                  |                     |                     |   |      |                     |
| Cases/person-time             | 17,397/4,188,575 | 916/304,396         | 316/125,825         | - |      |                     |
| Multivariable adjusted model† | 1.00             | 0.91 (0.85 to 0.97) | 0.85 (0.75 to 0.95) | - | 0.05 | 0.84 (0.71 to 1.00) |

\*Adjusted for age (years), ethnicity (white, African American, Asian, others), time-varying BMI (calculated as weight in kilograms divided by height in meters squared) (<21.0, 21.0-22.9, 23.0-24.9, 25.0-26.9, 27.0-29.9, 30.0-32.9, 33.0-34.9, or  $\geq 35.0$  kg/m<sup>2</sup>), smoking status (never smoked, past smoker, currently smoke 1-14 cigarettes per day, 15-24 cigarettes per day, or  $\geq 25$  cigarettes per day), alcohol intake (0, 0.1-4.9, 5.0-9.9, 10.0-14.9, 15.0-29.9, and  $\geq 30.0$  g/d), multivitamin use (yes, no), physical activity (quintiles), modified alternative healthy eating index (quintiles), and family history of diabetes. For women, postmenopausal hormone use (never, former, or current hormone use, or missing), and oral contraceptive use were further adjusted.

Study estimates from three cohorts were pooled using a fixed effects model.

†Baseline BMI (calculated as weight in kilograms divided by height in meters squared) (<21.0, 21.0-22.9, 23.0-24.9, 25.0-26.9, 27.0-29.9, 30.0-32.9, 33.0-34.9, or  $\geq 35.0$  kg/m<sup>2</sup>) was adjusted.

Study estimates from three cohorts were pooled using a fixed effects model.

‡P for trend was calculated using continuous exposure variables.

**Supplemental table 6.** Multivariable-adjusted pooled HRs (95% confidence intervals) of symptomatic type 2 diabetes for individual whole grain food consumption in Nurses' Health Study (1984-2014), Nurses' Health Study II (1991-2017), Health Professionals Follow-up Study (1986-2016)\*

|                                          | Consumption levels         |                                  |                                    |                     | P for trend‡ | Per serving daily   |
|------------------------------------------|----------------------------|----------------------------------|------------------------------------|---------------------|--------------|---------------------|
|                                          | Never or < 1 serving/month | 1 serving/month - 1 serving/week | 1 serving/week – 4-6 servings/week | ≥1 servings/d       |              |                     |
| <b>Whole grain cold breakfast cereal</b> |                            |                                  |                                    |                     |              |                     |
| Cases/person-time                        | 3,265/1,388,973            | 1,914/921,355                    | 2,395/1,667,250                    | 877/650,542         |              |                     |
| Multivariable adjusted model†            | 1.00                       | 0.95 (0.89 to 1.00)              | 0.74 (0.70 to 0.78)                | 0.78 (0.72 to 0.84) | <.0001       | 0.73 (0.68 to 0.79) |
| <b>Dark bread</b>                        |                            |                                  |                                    |                     |              |                     |
| Cases/person-time                        | 1,200/491,937              | 1,896/918,994                    | 2,817/1,731,883                    | 2,538/1,485,306     |              |                     |
| Multivariable adjusted model†            | 1.00                       | 0.92 (0.85 to 0.99)              | 0.80 (0.74 to 0.86)                | 0.79 (0.74 to 0.85) | <.0001       | 0.93 (0.90 to 0.96) |
| <b>Popcorn</b>                           |                            |                                  |                                    |                     |              |                     |
| Cases/person-time                        | 2,027/1,095,307            | 4,105/2,328,288                  | 1,880/1,027,801                    | 439/176,724         |              |                     |
| Multivariable adjusted model†            | 1.00                       | 0.99 (0.93 to 1.05)              | 0.95 (0.89 to 1.02)                | 1.07 (0.96 to 1.20) | 0.02         | 1.08 (1.01 to 1.15) |
|                                          | Never or < 1 serving/month | 1 serving/month - 1 serving/week | ≥2 servings/week                   |                     |              |                     |
| <b>Oatmeal</b>                           |                            |                                  |                                    |                     |              |                     |
| Cases/person-time                        | 4,344/2,253,847            | 3,178/1,688,813                  | 929/685,461                        | -                   |              |                     |
| Multivariable adjusted model†            | 1.00                       | 1.01 (0.96 to 1.05)              | 0.85 (0.79 to 0.91)                | -                   | 0.25         | 0.91 (0.77 to 1.07) |
| <b>Brown rice</b>                        |                            |                                  |                                    |                     |              |                     |
| Cases/person-time                        | 5,396/2,616,256            | 2,620/1,687,756                  | 435/324,109                        | -                   |              |                     |
| Multivariable adjusted model†            | 1.00                       | 0.98 (0.94 to 1.03)              | 1.00 (0.90 to 1.11)                | -                   | 0.13         | 1.18 (0.95 to 1.48) |
| <b>Added bran</b>                        |                            |                                  |                                    |                     |              |                     |
| Cases/person-time                        | 6,925/3,642,742            | 947/567,518                      | 579/417,860                        | -                   |              |                     |
| Multivariable adjusted model†            | 1.00                       | 1.01 (0.94 to 1.08)              | 0.94 (0.86 to 1.03)                | -                   | 0.05         | 0.90 (0.81 to 1.00) |
| <b>Wheat germ</b>                        |                            |                                  |                                    |                     |              |                     |
| Cases/person-time                        | 7,877/4,197,973            | 439/304,357                      | 135/125,790                        | -                   |              |                     |
| Multivariable adjusted model†            | 1.00                       | 0.99 (0.90 to 1.09)              | 0.89 (0.75 to 1.06)                | -                   | 0.50         | 0.92 (0.72 to 1.17) |

\*Patients without reporting any diabetes-related symptoms were censored during follow-up.

---

†Adjusted for age (years), ethnicity (white, African American, Asian, others), BMI (<21.0, 21.0-22.9, 23.0-24.9, 25.0-26.9, 27.0-29.9, 30.0-32.9, 33.0-34.9, or  $\geq$ 35.0 kg/m<sup>2</sup>), smoking status (never smoked, past smoker, currently smoke 1-14 cigarettes per day, 15-24 cigarettes per day, or  $\geq$ 25 cigarettes per day), alcohol intake (0, 0.1-4.9, 5.0-9.9, 10.0-14.9, 15.0-29.9, and  $\geq$ 30.0 g/d), multivitamin use (yes, no), physical activity (quintiles), modified alternative healthy eating index (quintiles), and family history of diabetes. For women, postmenopausal hormone use (never, former, or current hormone use, or missing), and oral contraceptive use were further adjusted.

Study estimates from three cohorts were pooled using a fixed effects model.

‡P for trend was calculated using continuous exposure variables.

**Supplemental table 7.** Multivariable-adjusted pooled HRs (95% confidence intervals) of type 2 diabetes for individual whole grain food consumption in Nurses' Health Study (1984-2014), Nurses' Health Study II (1991-2017), Health Professionals Follow-up Study (1986-2016) using multiple imputation for missing covariates.

|                                          | Consumption levels         |                                  |                                    |                     |                     | P for trend† | Per serving daily   |
|------------------------------------------|----------------------------|----------------------------------|------------------------------------|---------------------|---------------------|--------------|---------------------|
|                                          | Q1                         | Q2                               | Q3                                 | Q4                  | Q5                  |              |                     |
| <b>Total whole grain</b>                 |                            |                                  |                                    |                     |                     |              |                     |
| Multivariable adjusted model*            | 1.00                       | 0.87 (0.83 to 0.91)              | 0.81 (0.78 to 0.85)                | 0.73 (0.69 to 0.76) | 0.70 (0.67 to 0.74) | <.0001       | 0.87 (0.85 to 0.89) |
|                                          | Never or < 1 serving/month | 1 serving/month - 1 serving/week | 1 serving/week - 4-6 servings/week | ≥1 servings/d       |                     |              |                     |
| <b>Whole grain cold breakfast cereal</b> |                            |                                  |                                    |                     |                     |              |                     |
| Multivariable adjusted model*            | 1.00                       | 0.93 (0.89 to 0.96)              | 0.75 (0.72 to 0.78)                | 0.81 (0.77 to 0.85) |                     | <.0001       | 0.78 (0.74 to 0.81) |
| <b>Dark bread</b>                        |                            |                                  |                                    |                     |                     |              |                     |
| Multivariable adjusted model*            | 1.00                       | 0.91 (0.87 to 0.96)              | 0.79 (0.75 to 0.82)                | 0.79 (0.76 to 0.83) |                     | <.0001       | 0.93 (0.91 to 0.95) |
| <b>Popcorn</b>                           |                            |                                  |                                    |                     |                     |              |                     |
| Multivariable adjusted model*            | 1.00                       | 0.94 (0.92 to 0.97)              | 0.92 (0.88 to 0.97)                | 1.10 (1.02 to 1.19) |                     | 0.006        | 1.08 (1.03 to 1.13) |
|                                          | Never or < 1 serving/month | 1 serving/month - 1 serving/week | ≥2 servings/week                   |                     |                     |              |                     |
| <b>Oatmeal</b>                           |                            |                                  |                                    |                     |                     |              |                     |
| Multivariable adjusted model*            | 1.00                       | 0.95 (0.92 to 0.98)              | 0.79 (0.75 to 0.83)                | -                   |                     | <.0001       | 0.75 (0.66 to 0.84) |
| <b>Brown rice</b>                        |                            |                                  |                                    |                     |                     |              |                     |
| Multivariable adjusted model*            | 1.00                       | 0.96 (0.93 to 0.99)              | 0.88 (0.82 to 0.94)                | -                   |                     | 0.12         | 0.88 (0.74 to 1.04) |
| <b>Added bran</b>                        |                            |                                  |                                    |                     |                     |              |                     |
| Multivariable adjusted model*            | 1.00                       | 0.93 (0.89 to 0.98)              | 0.84 (0.79 to 0.90)                | -                   |                     | 0.002        | 0.89 (0.83 to 0.96) |
| <b>Wheat germ</b>                        |                            |                                  |                                    |                     |                     |              |                     |
| Multivariable adjusted model*            | 1.00                       | 0.92 (0.86 to 0.98)              | 0.87 (0.78 to 0.97)                | -                   |                     | 0.04         | 0.87 (0.76 to 0.99) |

\*Adjusted for age (years), ethnicity (white, African American, Asian, others), BMI (<21.0, 21.0-22.9, 23.0-24.9, 25.0-26.9, 27.0-29.9, 30.0-32.9, 33.0-34.9, or ≥35.0 kg/m<sup>2</sup>), smoking status (never smoked, past smoker, currently smoke 1-14 cigarettes per day, 15-24 cigarettes per day, or ≥25 cigarettes per day), alcohol intake (0, 0.1-4.9, 5.0-9.9, 10.0-14.9, 15.0-29.9, and ≥30.0 g/d), multivitamin use (yes, no), physical activity

---

(quintiles), modified alternative healthy eating index (quintiles), and family history of diabetes. For women, postmenopausal hormone use (never, former, or current hormone use, or missing), and oral contraceptive use were further adjusted.

Study estimates from three cohorts were pooled using a fixed effects model.

†P for trend was calculated using continuous exposure variables.

**Supplemental table 8.** Distribution of types of popcorns consumed among 675 participants in Nurses' Health Study, Nurses' Health Study II, and Health Professionals Follow-Up Study, 2008.

|                            | HPFS | NHS | NHSII | Average |
|----------------------------|------|-----|-------|---------|
| <b>Microwaved popcorn</b>  |      |     |       |         |
| Butter flavor              | 46%  | 51% | 47%   | 48%     |
| Cheese flavor              | 11%  | 7%  | 3%    | 7%      |
| Kettle Corn                | 14%  | 14% | 19%   | 16%     |
| Plain                      | 29%  | 28% | 30%   | 29%     |
| <b>Read-to-eat popcorn</b> |      |     |       |         |
| Cheese flavor              | 39%  | 40% | 55%   | 45%     |
| Butter flavor              | 61%  | 60% | 45%   | 55%     |
| <b>Home popped popcorn</b> |      |     |       |         |
| Cheese flavored            | 4%   | 3%  | 6%    | 4%      |
| Butter flavored oil        | 12%  | 10% | 11%   | 11%     |
| Dried butter flavored      | 7%   | 8%  | 8%    | 8%      |
| Real butter melted         | 15%  | 20% | 21%   | 19%     |
| Real margarine melted      | 9%   | 8%  | 10%   | 9%      |
| Cinnamon sugar             | 1%   | 0%  | 1%    | 1%      |
| Air popped                 | 24%  | 26% | 25%   | 25%     |
| Oil popped                 | 28%  | 24% | 19%   | 24%     |
| <b>Popcorn by Category</b> |      |     |       |         |
| Microwaved                 | 53%  | 59% | 61%   | 58%     |
| RTE                        | 8%   | 13% | 9%    | 10%     |
| Home Popped                | 39%  | 28% | 30%   | 32%     |
